# Supplementary material for: The Effects of Added Physical Activity on Performance during a Listening Comprehension Task for Students with and without Attention Problems
Source: Royal Society of Chemistry journal article supplement (doi:10.1039/d3cc02922k), 2012-04-01
Supplement: d3cc02922k1.pdf [file d3cc02922k1.pdf]

**Electronic Supporting Information file for**

**Highly efficient light-driven hydrogen evolution utilizing porphyrin-based nanoparticles**

Vasilis Nikolaou,<sup>[a]‡</sup> Eleni Agapaki,<sup>[a]‡</sup> Emmanouil Nikoloudakis,<sup>[a]</sup> Katerina Achilleos,<sup>[a]</sup> Kalliopi Ladomenou,<sup>[b]</sup> Georgios Charalambidis,<sup>[a]</sup> Evitina Triantafyllou,<sup>[a]</sup> Athanassios G. Coutsolelos<sup>[a][c]\*</sup>

<sup>[a]</sup>Laboratory of Bioinorganic Chemistry, Department of Chemistry, University of Crete, Voutes Campus, 70013 Heraklion, Crete, Greece.

<sup>[b]</sup>Laboratory of Inorganic Chemistry, Department of Chemistry, International Hellenic University, 65404 Kavala, Greece.

<sup>[c]</sup>Institute of Electronic Structure and Laser (IESL) Foundation for Research and Technology - Hellas (FORTH), Vassilika Vouton, 70013 Heraklion, Crete, Greece.

‡ These authors have equally contributed

\* Corresponding author: [acoutsol@uoc.gr](mailto:acoutsol@uoc.gr)

## Contents

|           |                                                                                                                                         |           |
|-----------|-----------------------------------------------------------------------------------------------------------------------------------------|-----------|
| <b>1.</b> | <b>Experimental section</b> .....                                                                                                       | <b>3</b>  |
| 1.1       | Materials.....                                                                                                                          | 3         |
| 1.2       | Instrumentation .....                                                                                                                   | 3         |
| 1.3       | Chemisorption of porphyrins onto Pt-TiO <sub>2</sub> .....                                                                              | 3         |
| 1.4       | Photocatalytic measurements .....                                                                                                       | 3         |
| 1.5       | Calculation of Turn Over Numbers (TONs) and H <sub>2</sub> evolution mmol (H <sub>2</sub> ) g (cat) <sup>-1</sup> h <sup>-1</sup> ..... | 4         |
| <b>2.</b> | <b>Synthesis and characterization</b> .....                                                                                             | <b>5</b>  |
| 2.1       | Synthesis.....                                                                                                                          | 5         |
| 2.2       | Characterization .....                                                                                                                  | 8         |
| <b>3.</b> | <b>Photophysical investigation</b> .....                                                                                                | <b>13</b> |
| <b>4.</b> | <b>Photocatalysis</b> .....                                                                                                             | <b>15</b> |
| <b>5.</b> | <b>References</b> .....                                                                                                                 | <b>19</b> |

## 1. Experimental section

### 1.1 Materials

All reagents were purchased from common commercial sources and used without any further purification, unless otherwise stated.

### 1.2 Instrumentation

Nuclear Magnetic Resonance (NMR) spectroscopy: The porphyrin moieties were analyzed with  $^1\text{H}$  NMR spectroscopy using Bruker AMX-500 MHz and Bruker DPX-300 MHz spectrometers. All measurements were carried out at room temperature in a deuterated solvent using residual protons as internal reference.

Ultraviolet–visible (UV-vis) absorption spectroscopy: In all studies, spectrometer Shimadzu UV-1700 was used. The reported experiments were performed using quartz cuvettes of 0.2 cm path-length.

### 1.3 Chemisorption of porphyrins onto Pt-TiO<sub>2</sub>

Prior to the porphyrin adsorption onto the titanium dioxide nanoparticles (TiO<sub>2</sub> NPs), it was necessary to prepare the 0.5 wt% platinumized TiO<sub>2</sub> NPs (Pt-TiO<sub>2</sub> NPs), following the experimental procedure described in recent publications of our research group.<sup>1</sup> In order to investigate the hydrogen production, it was necessary to determine the adsorption percentage of all porphyrins onto the Pt-TiO<sub>2</sub> surface. The Pt-TiO<sub>2</sub> NPs were soaked in porphyrin solutions of  $1 \times 10^{-5}$ ,  $5 \times 10^{-5}$ ,  $1 \times 10^{-4}$ ,  $1.5 \times 10^{-4}$ ,  $2 \times 10^{-4}$  and  $3 \times 10^{-4}$  M (in a mixture of dry Toluene/Ethanol in 1:1 ratio, see Table S1). The adsorption percentage for all porphyrins was calculated by comparing the absorption spectrum of the initial porphyrin solution with the supernatant solution.

The initial absorption spectrum was recorded, and consequently in each vial 5 mg of Pt-TiO<sub>2</sub> were added. The samples were sonicated for 5 minutes, stirred for 40 minutes and finally centrifuged for 10 minutes in 10000 revolutions per minute (rpm). The absorption spectrum of the supernatant solution was then recorded, in order to quantify the amount of absorbed porphyrin onto the Pt-TiO<sub>2</sub> NPs. The Pt-TiO<sub>2</sub> NPs were dried under high vacuum to remove any remaining solvent residues.

Overall, the DLs varied from 35%-100%, and these values were used to determine the turn over numbers (TONs) and H<sub>2</sub> production rate ( $\text{mmol g}^{-1} \text{h}^{-1}$ ).

### 1.4 Photocatalytic measurements

The photocatalytic H<sub>2</sub> evolution studies were performed in glass vials (39 mL) sealed with a rubber septum, at ambient temperature and pressure. Before each experiment, a fresh buffer solution was prepared. More precisely, the buffer solution was a 1M aqueous solution of ascorbic acid (AA) that was adjusted to pH=4 using aqueous solution of NaOH (5M). The dyed Pt-TiO<sub>2</sub> (5mg) were added in the glass vial together with 3mL of the buffer solution. The samples were sonicated for 5 minutes. In order to achieve anaerobic conditions, the suspensions were degassed using nitrogen for 5 min (in an ice/water bath). Finally, the samples were sealed with a silicon septum and were irradiated under continuous stirring with a low power white LED lamp ring of 40 W with color temperature 6400 K and lumen of 3800 LM.

The amount of H<sub>2</sub> production of each sample vial was determined using a Shimadzu GC 2010 plus chromatograph with a TCD detector and a molecular sieve 5 Å column (30 m - 0.53 mm). The analyzation of H<sub>2</sub> production was held every 6 hours and 24 hours of sample irradiation. For every measurement, 100 µL were taken from the headspace of the vial and were instantly injected in the GC.

In all cases, both the reported H<sub>2</sub> production values and the Turn Over Number (TON) are the average of three independent experiments.

### 1.5 Calculation of Turn Over Numbers (TONs) and H<sub>2</sub> evolution mmol (H<sub>2</sub>) g (cat)<sup>-1</sup> h<sup>-1</sup>

The TONs were calculated according to the following equation:

$$\text{TON} = \frac{n(\text{H}_2)}{n(\text{PS})}$$

Where: **n(H<sub>2</sub>)** is the total amount of the produced H<sub>2</sub> (in mmol) and **n(PS)** is the total amount of the photosensitizer (in mmol).

In every photocatalytic experiment 0.005 g of PtTiO<sub>2</sub> (0.5% (w/w) of Pt) were used. Thus, the final amount of the catalyst (Pt) in each experiment is 0.000025 g. The H<sub>2</sub> evolution rate was calculated according to the equation:

$$\text{H}_2 \text{ evolution mmol(H}_2\text{) g(cat)}^{-1} \text{ h}^{-1} = \frac{n(\text{H}_2)}{m(\text{Catalyst}) \times t}$$

Where: **n(H<sub>2</sub>)** is the total amount of the produced H<sub>2</sub> (in mmol), **m(catalyst)** is the total amount of Pt and Pd (in grams) and **t** is the irradiation time in hours (t = 24 h).

All the experiments were conducted in 3 ml Ascorbic Acid (1M) pH=4 as buffer solution, upon low power white LED lamp ring of 40 W.

## 2. Synthesis and characterization

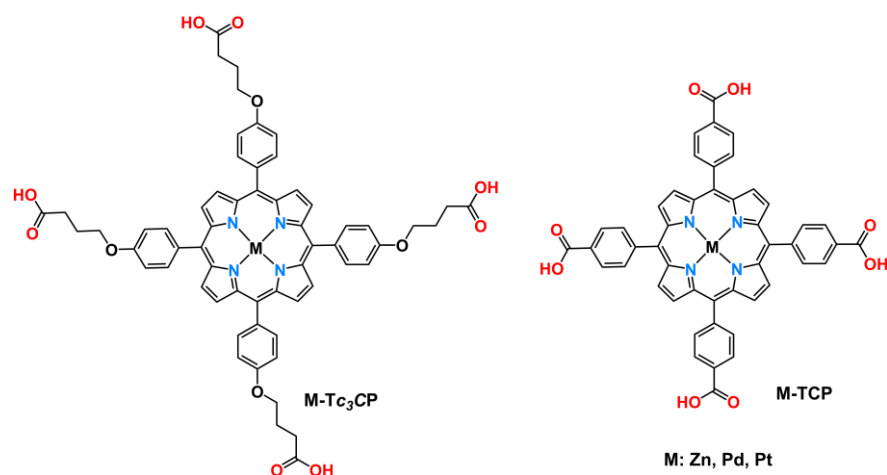

**Figure S1.** The porphyrin derivatives prepared and studied in this work. Left part: **M-TCP** (M = Zn, Pd, Pt), right part: **M-Tc<sub>3</sub>CP** (M = Zn, Pd, Pt).

### 2.1 Synthesis

In **Scheme S1**, the complete synthetic approach for the preparation of **M-Tc<sub>3</sub>CP** and **M-TCP** derivatives is described. In brief, the initial step corresponds to the formation of the free base porphyrins **2a** and **2b** via a “Alder and Longo” using pyrrole **1** and the respective benzaldehyde (**Ald<sub>1</sub>** or **Ald<sub>2</sub>**) in refluxing propionic acid. Subsequently, the formed **H<sub>2</sub>-TEP** and **H<sub>2</sub>-Tc<sub>3</sub>EP** porphyrins were transformed into the corresponding metalated complexes **M-TEP** and **M-Tc<sub>3</sub>EP** (M: Zn, Pd, or Pt) in almost quantitative yields using the corresponding metal salts and a refluxing solvent (see caption of Scheme 1 and ESI for details). Finally, upon hydrolysis with potassium hydroxide the final **M-TCP** and **M-Tc<sub>3</sub>CP** were formed.

The preparation of **H<sub>2</sub>-TEP**<sup>2</sup>, **H<sub>2</sub>-Tc<sub>3</sub>EP**<sup>3</sup>, **Pt-Tc<sub>3</sub>EP**<sup>3</sup>, **Pd-Tc<sub>3</sub>EP**<sup>4</sup>, **Zn-Tc<sub>3</sub>EP**<sup>5</sup>, **Pt-Tc<sub>3</sub>CP**<sup>3</sup>, **Pd-Tc<sub>3</sub>CP**<sup>4</sup>, **Zn-Tc<sub>3</sub>CP**<sup>5</sup> has been carried out following literature procedures.<sup>2-5</sup>

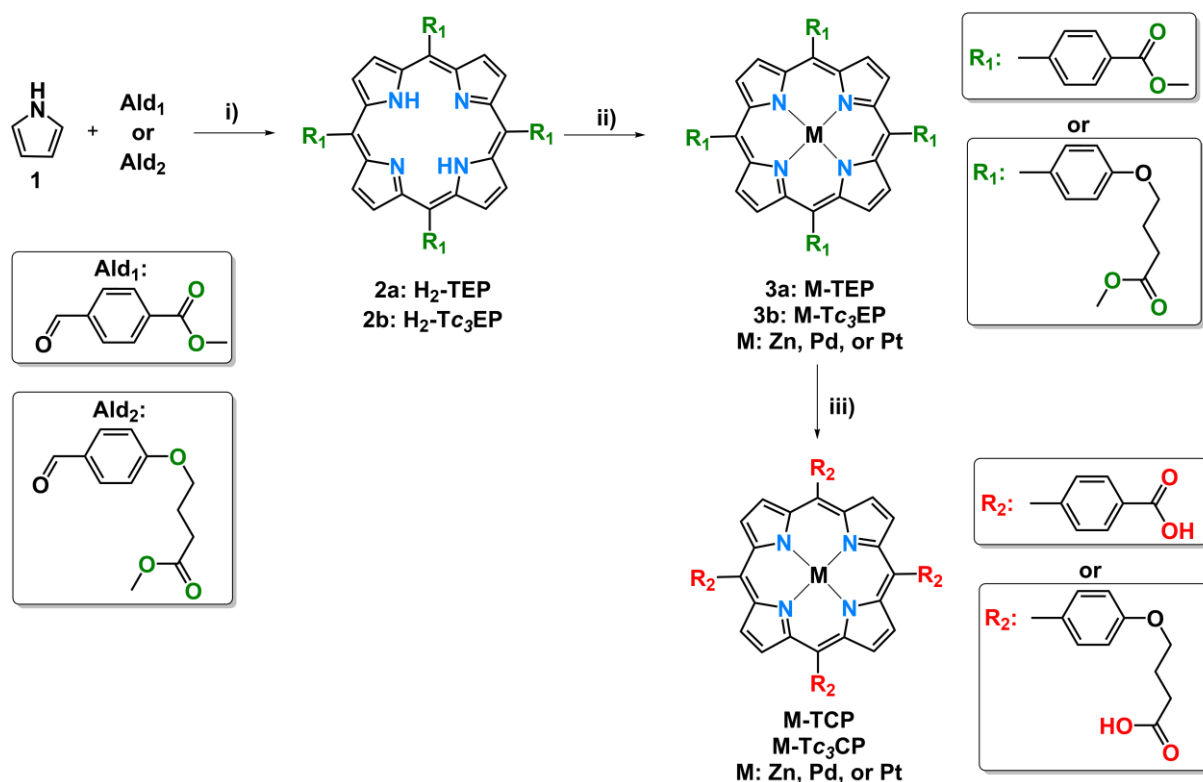

**Scheme S1.** Synthetic approach for **M-TCP** and **M-Tc<sub>3</sub>CP** derivatives. Experimental details: i) propionic acid, reflux, **Ald<sub>1</sub>** (methyl 4-formylbenzoate) or **Ald<sub>2</sub>** (ethyl 4(4-formylphenoxy)butanoate),<sup>27</sup> pyrrole **1** ii) for **Zn-TEP** and **Zn-Tc<sub>3</sub>EP**: Zn(CH<sub>3</sub>COO)<sub>2</sub>·2H<sub>2</sub>O CH<sub>2</sub>Cl<sub>2</sub>/MeOH, rt; for and **Pd-TEP** and **Pd-Tc<sub>3</sub>EP**: PdCl<sub>2</sub>, benzonitrile, reflux; for **Pt-TEP** and **Pt-Tc<sub>3</sub>EP**: PtCl<sub>2</sub>, benzonitrile, reflux; iv) THF, MeOH, KOH, rt.

**Zn-TEP:** To a CH<sub>2</sub>Cl<sub>2</sub> solution (16 mL) of **H<sub>2</sub>-TEP** (0.04 gr, 0.047 mmol), a MeOH (2 mL) solution containing 0.104 g of Zn(CH<sub>3</sub>COO)<sub>2</sub>·2H<sub>2</sub>O (0.47 mmol) was added and the reaction mixture was refluxed for 3 h. Upon reaction completion, the volatiles were evaporated, the porphyrin was diluted in CH<sub>2</sub>Cl<sub>2</sub> and washed with H<sub>2</sub>O (3 x 25 mL). The solvent was consequently removed under reduced pressure and the produced porphyrin then purified by column chromatography (silica gel, CH<sub>2</sub>Cl<sub>2</sub>/EtOH, 99:1 v/v), yielding the final product **Zn-TEP** (0.038 gr, yield: 88%).

<sup>1</sup>H NMR (500 MHz, CDCl<sub>3</sub>): δ 8.72 (s, 8H), 8.43 (d, *J* = 8.2 Hz, 8H), 8.23 (d, *J* = 8.2 Hz, 8H), 4.10 (s, 12H) ppm.

**Zn-TCP:** To a solution of **Zn-TEP** (0.050 gr, 0.055 mmol) in 55 mL of a THF/MeOH mixture (2:1), an aqueous solution of KOH (1.03 gr, 18.4 mmol) was added. The reaction mixture was stirred at room temperature overnight. Subsequently, the organic solvents were evaporated under reduced pressure and distilled H<sub>2</sub>O was added to the residue. Acidification of the mixture by using HCl (1 M aq.) resulted in the precipitation of the porphyrin which was filtered, washed with distilled H<sub>2</sub>O and finally dried yielding the final **Zn-TCP** (0.045 gr, 96%).

<sup>1</sup>H NMR (500 MHz, (CD<sub>3</sub>)<sub>2</sub>SO): δ 8.80 (s, 8H), 8.37 (d, *J* = 7.9 Hz, 8H), 8.30 (d, *J* = 7.8 Hz, 8H) ppm.

**Zn-TCP:** HRMS-(MALDI-TOF): *m/z* calc. for [M]<sup>+</sup> C<sub>48</sub>H<sub>28</sub>N<sub>4</sub>O<sub>8</sub>Zn 852.1199, found 852.1129.

**Pt-TEP:** PtCl<sub>2</sub> (0.079 gr, 0.030 mmol) was added in 20 mL of benzonitrile and the mixture was refluxed for 1 h. Then, **H<sub>2</sub>-TEP** (0.05gr, 0.059 mmol) was added in the solution and the reaction was left under reflux conditions for 2 additional hours. Upon the completion of the reaction, the benzonitrile was removed and the porphyrin was diluted in CH<sub>2</sub>Cl<sub>2</sub> and washed with aqueous NaCl (2 x 30 mL) and H<sub>2</sub>O (1 x 30 mL). Finally, the solvent was removed under reduced pressure and the produced porphyrin then purified by column chromatography (silica gel, CH<sub>2</sub>Cl<sub>2</sub>/EtOH, 99:1 v/v) yielding the final **Pt-TEP** (0.047 gr, yield: 77%).

**<sup>1</sup>H NMR (500 MHz, CDCl<sub>3</sub>):** δ 8.72 (s, 8H), 8.43 (d, *J* = 8.3 Hz, 8H), 8.23 (d, *J* = 8.2 Hz, 8H), 4.10 (s, 12H) ppm.

**Pt-TCP:** To a solution of **Pt-TEP** (0.054 gr, 0.052 mmol) in 59 mL of a THF/MeOH mixture (2:1), an aqueous solution of KOH (0.97 gr, 17.3 mmol) was added. The reaction mixture was stirred at room temperature overnight. Subsequently, the organic solvents were evaporated under reduced pressure and distilled H<sub>2</sub>O was added to the residue. Acidification of the mixture by using HCl (1 M aq.) resulted in the precipitation of the porphyrin which was filtered, washed with distilled H<sub>2</sub>O and finally dried yielding the final **Pt-TCP** (0.05 gr, 98%).

**<sup>1</sup>H NMR (500 MHz, (CD<sub>3</sub>)<sub>2</sub>SO):** δ 8.76 (s, 8H), 8.37 (d, *J* = 8.1 Hz, 8H), 8.30 (d, *J* = 8.0 Hz, 8H) ppm.

**Pt-TCP:** HRMS-(MALDI-TOF): *m/z* calc. for [M]<sup>+</sup> C<sub>48</sub>H<sub>28</sub>N<sub>4</sub>O<sub>8</sub>Pt 983.1555, found 983.1442.

**Pd-TEP:** PdCl<sub>2</sub> (0.050 gr, 0.059 mmol) was added in 20 mL of benzonitrile and the mixture was refluxed for 1 h. Then, **H<sub>2</sub>-TEP** (0.05 gr, 0.059 mmol) was added in the solution and the reaction was left under reflux conditions for 2 additional hours. Upon the completion of the reaction, the benzonitrile was removed and the porphyrin was diluted in CH<sub>2</sub>Cl<sub>2</sub> and washed with aqueous NaCl (2 x 30 mL) and H<sub>2</sub>O (1 x 30 mL). Finally, the solvent was removed under reduced pressure and the produced porphyrin then purified by column chromatography (silica gel, CH<sub>2</sub>Cl<sub>2</sub>/EtOH, 99:1 v/v) yielding the final **Pd-TEP** (0.047 gr, yield: 84%).

**<sup>1</sup>H NMR (500 MHz, CDCl<sub>3</sub>):** δ 8.72 (s, 8H), 8.43 (d, *J* = 8.3 Hz, 8H), 8.20 (d, *J* = 8.2 Hz, 8H), 4.10 (s, 12H) ppm.

**Pd-TCP:** To a solution of **Pd-TEP** (0.047 gr, 0.049 mmol) in 51 mL of a THF/MeOH mixture (2:1), an aqueous solution of KOH (0.92 gr, 16.5 mmol) was added. The reaction mixture was stirred at room temperature overnight. Subsequently, the organic solvents were evaporated under reduced pressure and distilled H<sub>2</sub>O was added to the residue. Acidification of the mixture by using HCl (1 M aq.) resulted in the precipitation of the porphyrin which was filtered, washed with distilled H<sub>2</sub>O and finally dried yielding the final **Pd-TCP** (0.042 gr, 95%).

**<sup>1</sup>H NMR (500 MHz, (CD<sub>3</sub>)<sub>2</sub>SO):** δ 8.80 (s, 8H), 8.36 (d, *J* = 8.2 Hz, 8H), 8.29 (d, *J* = 8.0 Hz, 8H) ppm.

**Pd-TCP:** HRMS-(MALDI-TOF): *m/z* calc. for [M]<sup>+</sup> C<sub>48</sub>H<sub>28</sub>N<sub>4</sub>O<sub>8</sub>Pd 894.0942, found 894.0912.

## 2.2 Characterization

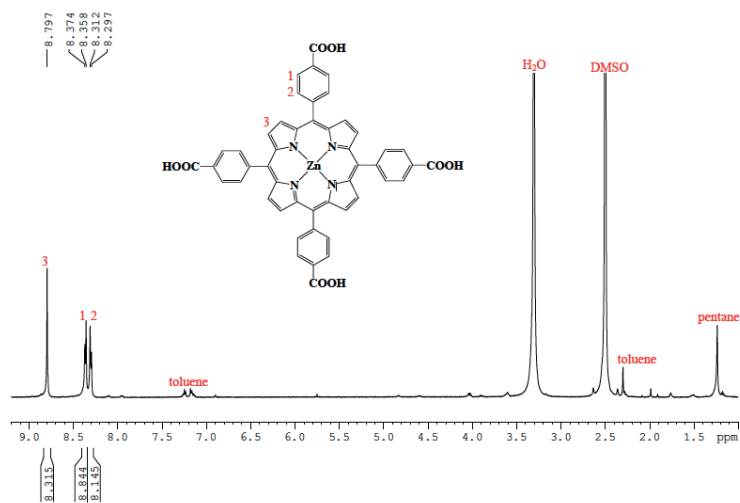

**Figure S2.**  $^1\text{H}$  NMR spectra of Zn-TCP (500 MHz,  $(\text{CD}_3)_2\text{SO}$ ).

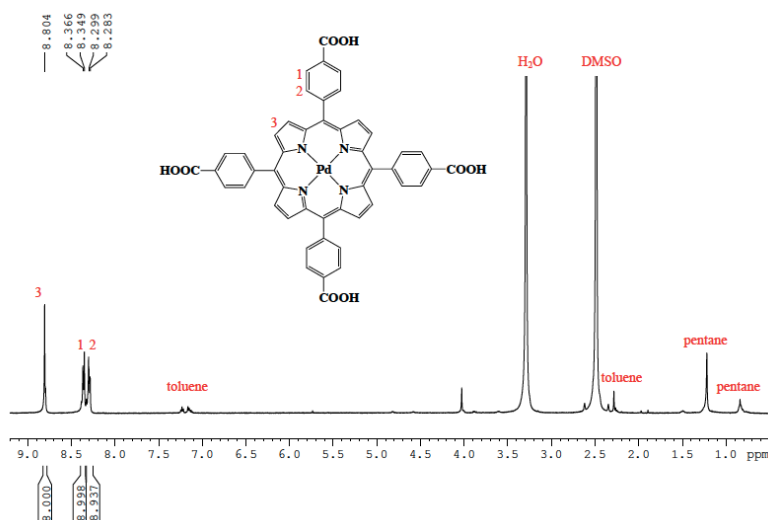

**Figure S3.**  $^1\text{H}$  NMR spectra of Pd-TCP (500 MHz,  $(\text{CD}_3)_2\text{SO}$ ).

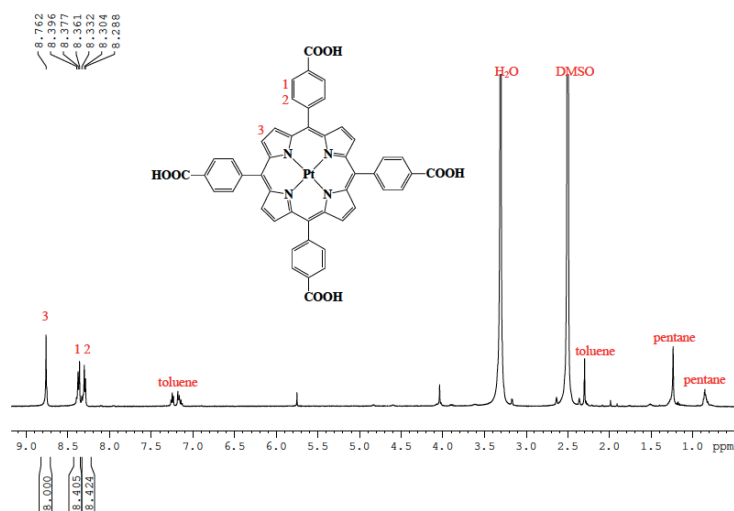

**Figure S4.**  $^1\text{H}$  NMR spectra of Pt-TCP (500 MHz,  $(\text{CD}_3)_2\text{SO}$ ).



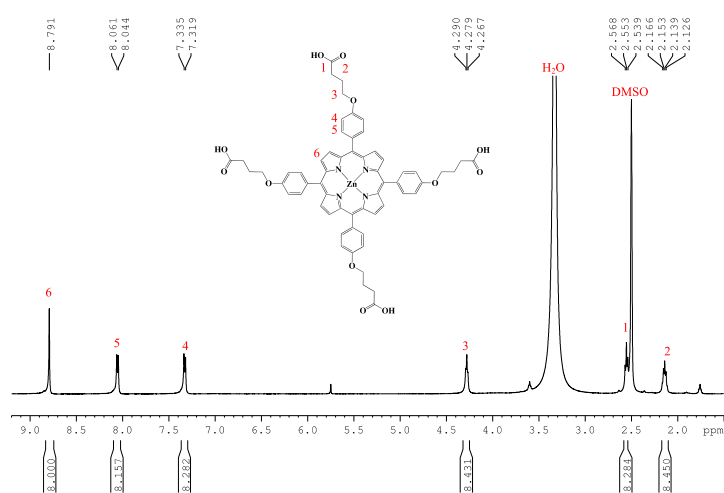

Figure S5. <sup>1</sup>H NMR spectra of Zn-Tc<sub>3</sub>P (500 MHz, (CD<sub>3</sub>)<sub>2</sub>SO)

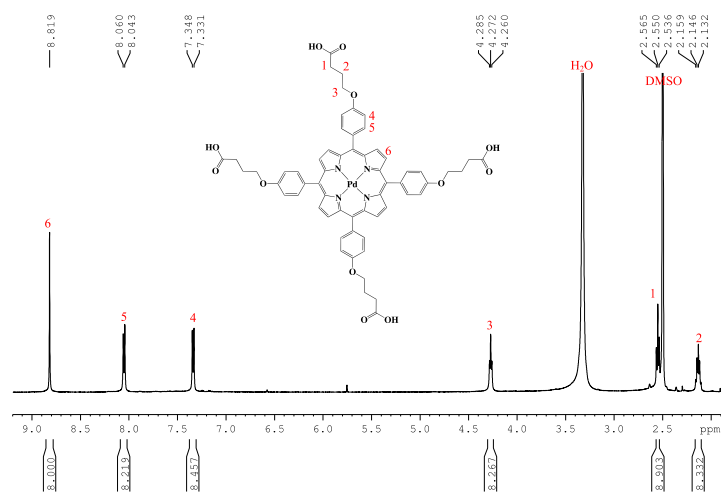

Figure S6. <sup>1</sup>H NMR spectra of Pd-Tc<sub>3</sub>P (500 MHz, (CD<sub>3</sub>)<sub>2</sub>SO)

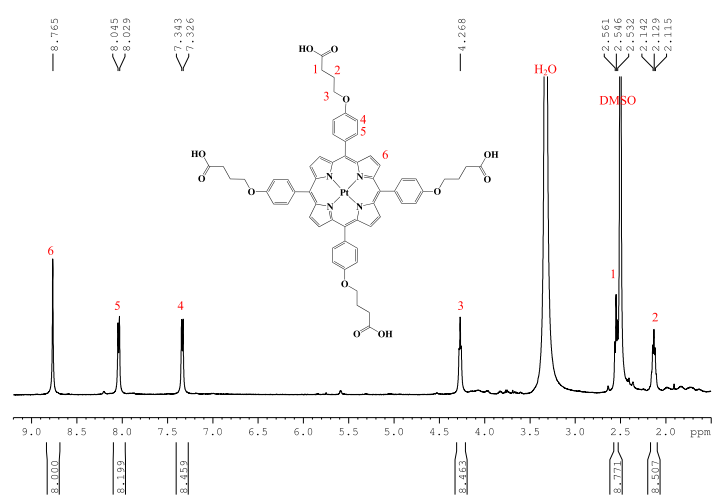

Figure S7. <sup>1</sup>H NMR spectra of Pt-Tc<sub>3</sub>P (500 MHz, (CD<sub>3</sub>)<sub>2</sub>SO)

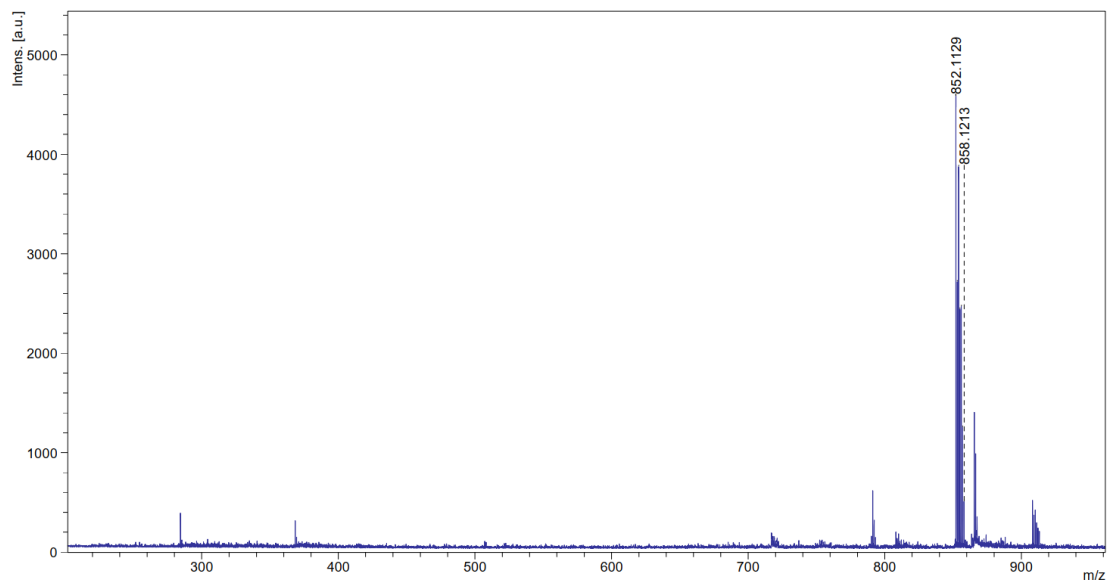

**Figure S8.** HRMS-(MALDI-TOF) of Zn-TCP.

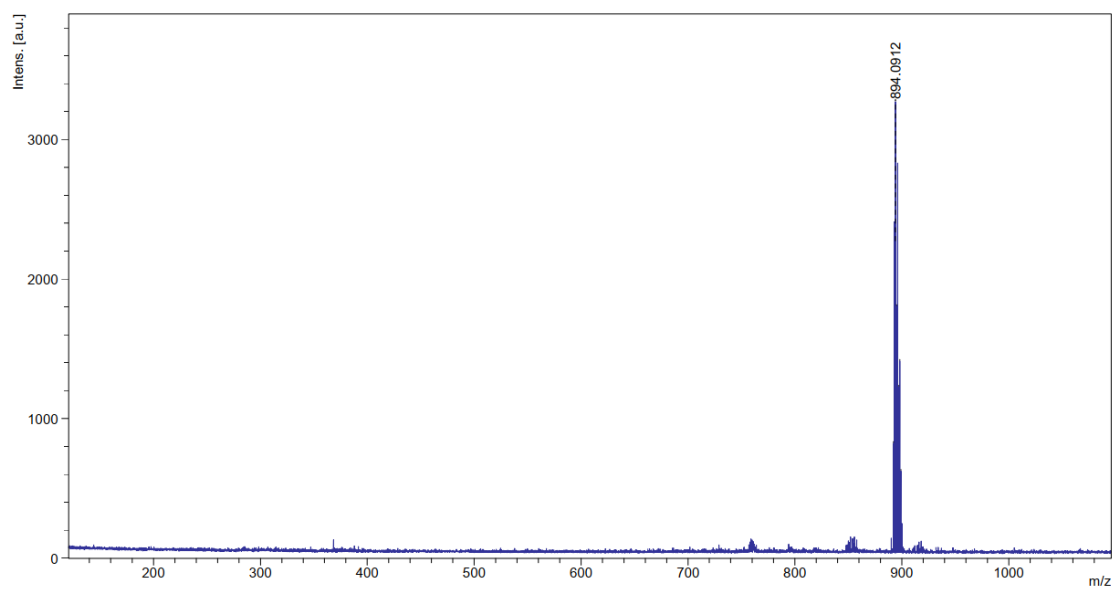

**Figure S9.** HRMS-(MALDI-TOF) of Pd-TCP.

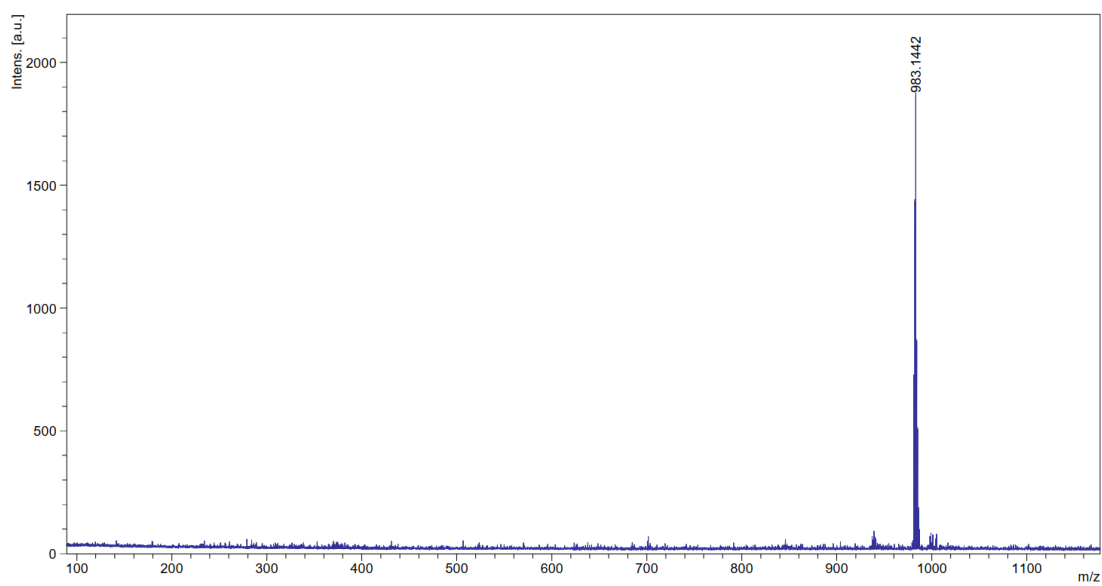

**Figure S10.** HRMS-(MALDI-TOF) of Pt-TCP.

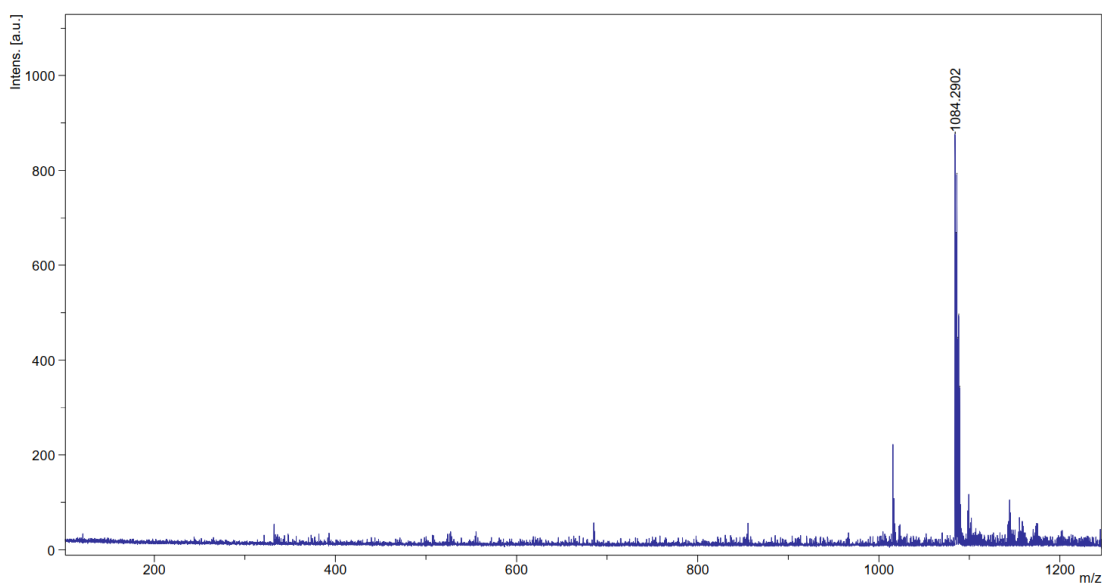

**Figure S11.** HRMS-(MALDI-TOF) of Zn-Tc<sub>3</sub>P.

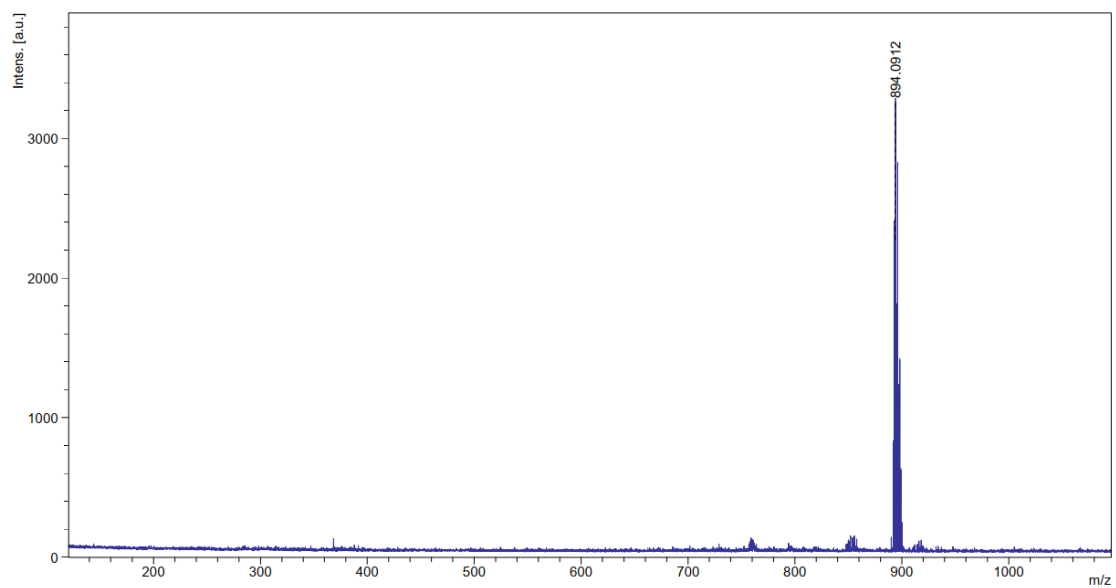

**Figure S12.** HRMS-(MALDI-TOF) of Pd-Tc<sub>3</sub>P.

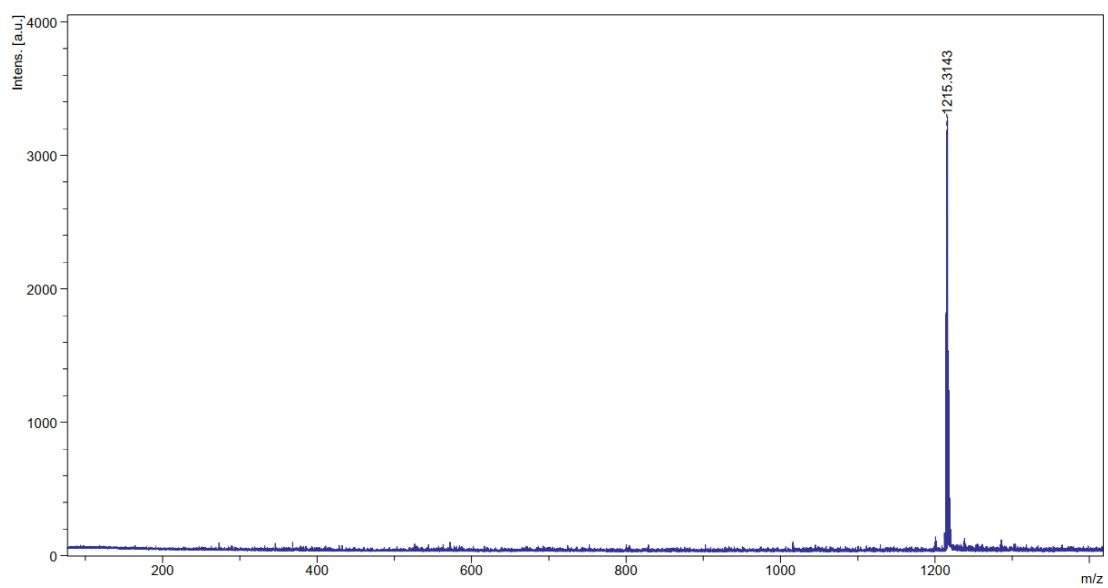

**Figure S13.** HRMS-(MALDI-TOF) of Pt-Tc<sub>3</sub>P.

### 3. Photophysical investigation

**Table S1.** Absorption data for **M-TCP** and **M-Tc<sub>3</sub>CP** (M: Zn, Pd, or Pt) in Tol/ EtOH 1:1 solvent mixture.

| Compound              | $\lambda_{max}/nm$ ( $\epsilon / mM^{-1} cm^{-1}$ ) |
|-----------------------|-----------------------------------------------------|
| Zn-TCP                | 428 (431.1), 559 (19.8), 600 (8.4)                  |
| Zn-Tc <sub>3</sub> CP | 428 (560.9), 560 (160.5), 602 (78.1)                |
| Pd-TCP                | 409 (255.6), 515 (21.3)                             |
| Pd-Tc <sub>3</sub> CP | 421 (238), 526 (15.8)                               |
| Pt-TCP                | 403 (248.5), 510 (23.6)                             |
| Pt-Tc <sub>3</sub> CP | 407 (202.3), 512 (21.2)                             |

**Table S2.** Oxidation and reduction data for **Zn-Tc<sub>3</sub>CP**, **Pd-Tc<sub>3</sub>CP**, and **Pt-Tc<sub>3</sub>CP** reported vs. SCE reference electrode in tetrahydrofuran (THF) at room temperature using tetrabutylammonium hexafluorophosphate (0.1 M) as the supporting electrolyte.

| Porphyrin             | $E_{1/2}^{ox1}/V$ | $E_{1/2}^{ox2}/V$ | $E_{1/2}^{red1}/V$ | $E_{1/2}^{red2}/V$ | $E_{00}$ | $\Delta G_{inj}$ | $\Delta G_{reg}$ |
|-----------------------|-------------------|-------------------|--------------------|--------------------|----------|------------------|------------------|
| Zn-Tc <sub>3</sub> CP | 0.81              | 1.09              | -1.31              | -1.73              | 2.12     | -0.67            | -0.35            |
| Pd-Tc <sub>3</sub> CP | 1.21              | 1.47              | -1.31              | -1.53              | 1.92     | -0.71            | -0.75            |
| Pt-Tc <sub>3</sub> CP | 1.27              | 1.54              | -1.27              | -1.60              | 1.95     | -0.75            | -0.81            |

<sup>a</sup>  $E_{00}$  in eV was calculated with the wavelength at the intersection of normalized absorption and emission spectra.

<sup>c</sup>  $\Delta G_{inj}$  in eV was calculated according to  $\Delta G_{inj} = E_{ox}(Por^+/Por) - E_{00} - E_{CB}(TiO_2)$  measured at pH = 4 with  $E_{CB}(TiO_2) = -0.4 - 0.059 \cdot pH$ ;<sup>7</sup>

<sup>d</sup>  $\Delta G_{reg}$  in eV was calculated according to  $\Delta G_{reg} = E_{ox}(SED^+/SED) - E_{ox}(Por^+/Por)$ .  $E_{ox}(SED^+/SED) = 0.46$  V vs. SCE<sup>8</sup>

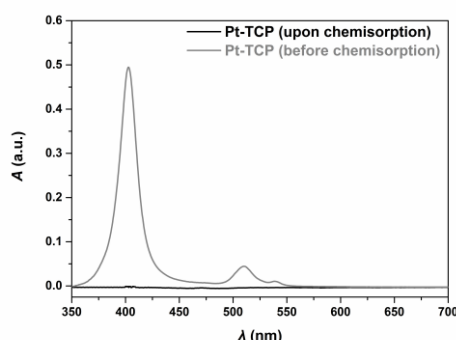

**Figure S14.** Absorption spectra of **Pt-TCP** ( $1.0 \times 10^{-5}$  M) before and after chemisorption onto Pt-TiO<sub>2</sub> NPs.

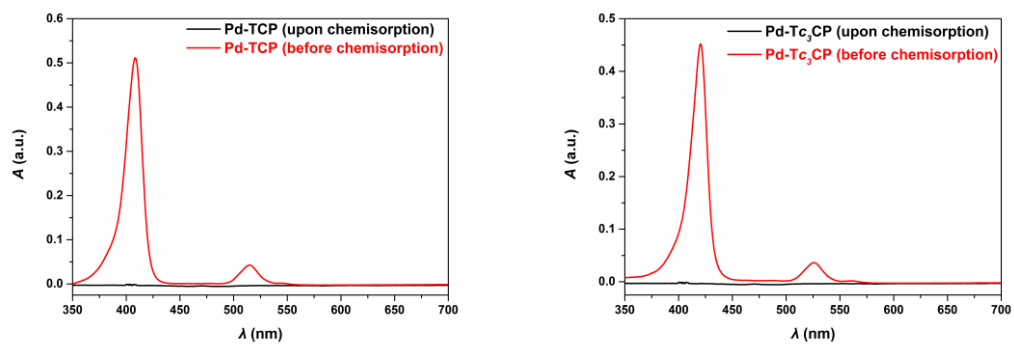

**Figure S15.** Absorption spectra of a) **Pd-Tc<sub>3</sub>CP** and b) **Pd-TCP** ( $1.0 \times 10^{-5}$  M) before and after chemisorption onto Pt-TiO<sub>2</sub> NPs.

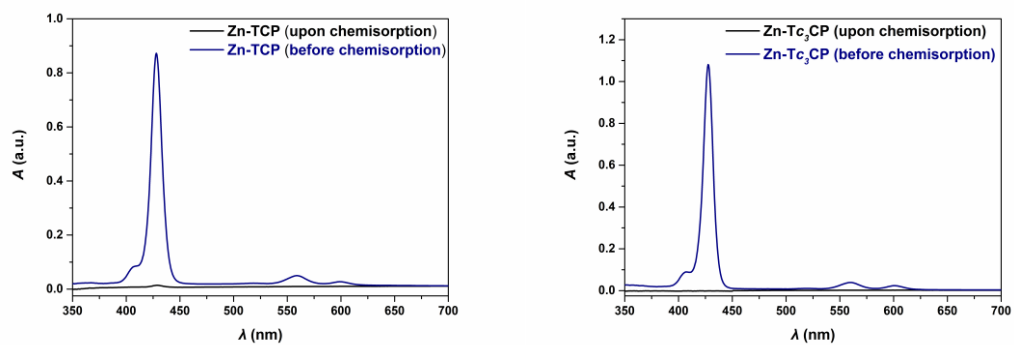

**Figure S16.** Absorption spectra of a) **Zn-Tc<sub>3</sub>CP** and b) **Zn-TCP** ( $1.0 \times 10^{-5}$  M) before and after chemisorption onto Pt-TiO<sub>2</sub> NPs.

#### 4. Photocatalysis

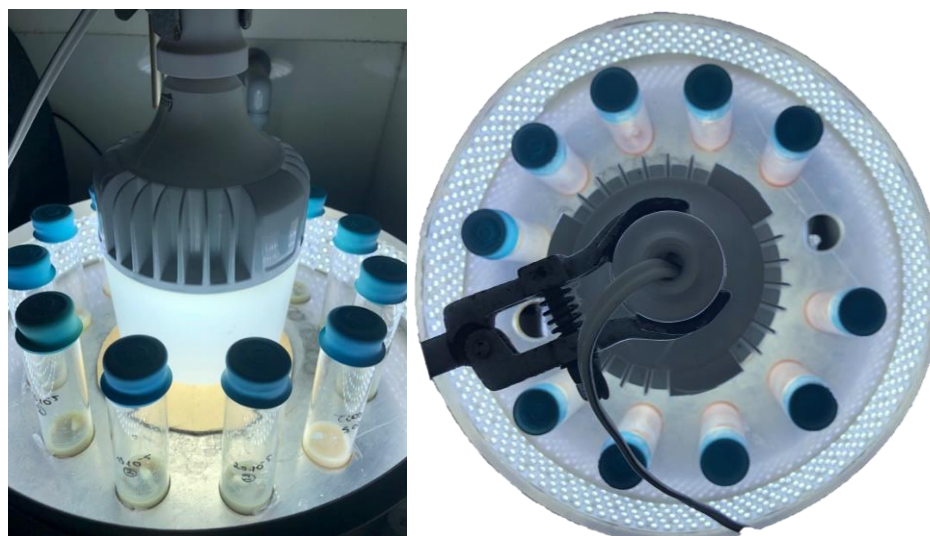

Figure S17. The experimental set up using a LED lamp.

Table S3. Photocatalytic data for **Zn-TCP** in several concentrations.

| Sample | Concentration (M) <sup>[a]</sup> | DL (%) <sup>[b]</sup> | PS <sup>[c]</sup>      | TONs <sup>[d]</sup> | Activity (mmol g <sup>-1</sup> h <sup>-1</sup> ) <sup>[e]</sup> |
|--------|----------------------------------|-----------------------|------------------------|---------------------|-----------------------------------------------------------------|
| Zn-TCP | 1.0 x 10 <sup>-5</sup>           | 100                   | 3.0 x 10 <sup>-8</sup> | 1192                | 60                                                              |
| Zn-TCP | 5.0 x 10 <sup>-5</sup>           | 100                   | 1.5 x 10 <sup>-7</sup> | 1078                | 270                                                             |
| Zn-TCP | 1.0 x 10 <sup>-4</sup>           | 74                    | 2.2 x 10 <sup>-7</sup> | 691                 | 257                                                             |
| Zn-TCP | 1.5 x 10 <sup>-4</sup>           | 60                    | 2.8 x 10 <sup>-7</sup> | 796                 | 360                                                             |
| Zn-TCP | 2.0 x 10 <sup>-4</sup>           | 42                    | 2.5 x 10 <sup>-7</sup> | 671                 | 280                                                             |

Table S4. Photocatalytic data for **Zn-Tc<sub>3</sub>CP** in several concentrations.

| Sample                | Concentration (M) <sup>[a]</sup> | DL (%) <sup>[b]</sup> | PS <sup>[c]</sup>      | TONs <sup>[d]</sup> | Activity (mmol g <sup>-1</sup> h <sup>-1</sup> ) <sup>[e]</sup> |
|-----------------------|----------------------------------|-----------------------|------------------------|---------------------|-----------------------------------------------------------------|
| Zn-Tc <sub>3</sub> CP | 1.0 x 10 <sup>-5</sup>           | 100                   | 3.0 x 10 <sup>-8</sup> | 1012                | 51                                                              |
| Zn-Tc <sub>3</sub> CP | 5.0 x 10 <sup>-5</sup>           | 100                   | 1.5 x 10 <sup>-7</sup> | 868                 | 216                                                             |
| Zn-Tc <sub>3</sub> CP | 1.0 x 10 <sup>-4</sup>           | 74                    | 2.2 x 10 <sup>-7</sup> | 904                 | 331                                                             |
| Zn-Tc <sub>3</sub> CP | 1.5 x 10 <sup>-4</sup>           | 58                    | 2.6 x 10 <sup>-7</sup> | 788                 | 344                                                             |
| Zn-Tc <sub>3</sub> CP | 2.0 x 10 <sup>-4</sup>           | 41                    | 2.5 x 10 <sup>-7</sup> | 1031                | 421                                                             |

Table S5. Photocatalytic data for **Pd-TCP** in several concentrations.

| Sample | Concentration (M) <sup>[a]</sup> | DL (%) <sup>[b]</sup> | PS <sup>[c]</sup>      | TONs <sup>[d]</sup> | Activity (mmol g <sup>-1</sup> h <sup>-1</sup> ) <sup>[e]</sup> |
|--------|----------------------------------|-----------------------|------------------------|---------------------|-----------------------------------------------------------------|
| Pd-TCP | 1.0 x 10 <sup>-5</sup>           | 100                   | 3.0 x 10 <sup>-8</sup> | 1096                | 49                                                              |
| Pd-TCP | 5.0 x 10 <sup>-5</sup>           | 100                   | 1.5 x 10 <sup>-7</sup> | 1004                | 153                                                             |
| Pd-TCP | 1.0 x 10 <sup>-4</sup>           | 80                    | 2.4 x 10 <sup>-7</sup> | 902                 | 178                                                             |
| Pd-TCP | 1.5 x 10 <sup>-4</sup>           | 62                    | 2.8 x 10 <sup>-7</sup> | 970                 | 206                                                             |
| Pd-TCP | 2.0 x 10 <sup>-4</sup>           | 51                    | 3.0 x 10 <sup>-7</sup> | 1131                | 250                                                             |
| Pd-TCP | 3.0 x 10 <sup>-4</sup>           | 35                    | 3.2 x 10 <sup>-7</sup> | 1147                | 257                                                             |

**Table S6.** Photocatalytic data for **Pd-Tc<sub>3</sub>CP** in several concentrations.

| <i>Sample</i>         | <i>Concentration (M) <sup>[a]</sup></i> | <i>DL (%) <sup>[b]</sup></i> | <i>PS <sup>[c]</sup></i> | <i>TONs <sup>[d]</sup></i> | <i>Activity (mmol g<sup>-1</sup> h<sup>-1</sup>) <sup>[e]</sup></i> |
|-----------------------|-----------------------------------------|------------------------------|--------------------------|----------------------------|---------------------------------------------------------------------|
| Pd-Tc <sub>3</sub> CP | 1.0 × 10 <sup>-5</sup>                  | 100                          | 3.0 × 10 <sup>-8</sup>   | 7722                       | 342                                                                 |
| Pd-Tc <sub>3</sub> CP | 5.0 × 10 <sup>-5</sup>                  | 100                          | 1.5 × 10 <sup>-7</sup>   | 3889                       | 593                                                                 |
| Pd-Tc <sub>3</sub> CP | 1.0 × 10 <sup>-4</sup>                  | 98                           | 3.0 × 10 <sup>-7</sup>   | 2226                       | 485                                                                 |
| Pd-Tc <sub>3</sub> CP | 1.5 × 10 <sup>-4</sup>                  | 75                           | 3.4 × 10 <sup>-7</sup>   | 2114                       | 487                                                                 |
| Pd-Tc <sub>3</sub> CP | 2.0 × 10 <sup>-4</sup>                  | 65                           | 3.9 × 10 <sup>-7</sup>   | 1760                       | 430                                                                 |
| Pd-Tc <sub>3</sub> CP | 3.0 × 10 <sup>-4</sup>                  | 48                           | 4.4 × 10 <sup>-7</sup>   | 1481                       | 376                                                                 |

**Table S7.** Photocatalytic data for **Pt-TCP** in several concentrations.

| <i>Sample</i> | <i>Concentration (M) <sup>[a]</sup></i> | <i>DL (%) <sup>[b]</sup></i> | <i>PS <sup>[c]</sup></i> | <i>TONs <sup>[d]</sup></i> | <i>Activity (mmol g<sup>-1</sup> h<sup>-1</sup>) <sup>[e]</sup></i> |
|---------------|-----------------------------------------|------------------------------|--------------------------|----------------------------|---------------------------------------------------------------------|
| Pt-TCP        | 1.0 × 10 <sup>-5</sup>                  | 100                          | 3.0 × 10 <sup>-8</sup>   | 2018                       | 82                                                                  |
| Pt-TCP        | 5.0 × 10 <sup>-5</sup>                  | 99                           | 1.5 × 10 <sup>-7</sup>   | 2078                       | 238                                                                 |
| Pt-TCP        | 1.0 × 10 <sup>-4</sup>                  | 92                           | 2.8 × 10 <sup>-7</sup>   | 2139                       | 312                                                                 |
| Pt-TCP        | 1.5 × 10 <sup>-4</sup>                  | 66                           | 3.0 × 10 <sup>-7</sup>   | 2380                       | 355                                                                 |
| Pt-TCP        | 2.0 × 10 <sup>-4</sup>                  | 50                           | 3.0 × 10 <sup>-7</sup>   | 2525                       | 378                                                                 |
| Pt-TCP        | 30.0 × 10 <sup>-5</sup>                 | 36                           | 3.2 × 10 <sup>-7</sup>   | 2176                       | 332                                                                 |

**Table S8.** Photocatalytic data for **Pt-Tc<sub>3</sub>CP** in several concentrations.

| <i>Sample</i>         | <i>Concentration (M) <sup>[a]</sup></i> | <i>DL (%) <sup>[b]</sup></i> | <i>PS <sup>[c]</sup></i> | <i>TONs <sup>[d]</sup></i> | <i>Activity (mmol g<sup>-1</sup> h<sup>-1</sup>) <sup>[e]</sup></i> |
|-----------------------|-----------------------------------------|------------------------------|--------------------------|----------------------------|---------------------------------------------------------------------|
| Pt-Tc <sub>3</sub> CP | 1.0 × 10 <sup>-6</sup>                  | 100                          | 3.0 × 10 <sup>-9</sup>   | 0                          | 0                                                                   |
| Pt-Tc <sub>3</sub> CP | 5.0 × 10 <sup>-6</sup>                  | 100                          | 1.5 × 10 <sup>-8</sup>   | 11607                      | 500                                                                 |
| Pt-Tc <sub>3</sub> CP | 1.0 × 10 <sup>-5</sup>                  | 100                          | 3.0 × 10 <sup>-8</sup>   | 10819                      | 707                                                                 |
| Pt-Tc <sub>3</sub> CP | 5.0 × 10 <sup>-5</sup>                  | 100                          | 1.5 × 10 <sup>-7</sup>   | 3981                       | 459                                                                 |
| Pt-Tc <sub>3</sub> CP | 1.0 × 10 <sup>-4</sup>                  | 93                           | 2.8 × 10 <sup>-7</sup>   | 2511                       | 367                                                                 |
| Pt-Tc <sub>3</sub> CP | 1.5 × 10 <sup>-4</sup>                  | 71                           | 3.2 × 10 <sup>-7</sup>   | 2771                       | 422                                                                 |
| Pt-Tc <sub>3</sub> CP | 2.0 × 10 <sup>-4</sup>                  | 58                           | 3.5 × 10 <sup>-7</sup>   | 2337                       | 365                                                                 |
| Pt-Tc <sub>3</sub> CP | 3.0 × 10 <sup>-4</sup>                  | 43                           | 3.9 × 10 <sup>-7</sup>   | 1997                       | 320                                                                 |

<sup>[a]</sup>The concentration of the initial solutions (3 mL in dry Tol / EtOH 1:1) that were used for the adsorption of the porphyrin, <sup>[b]</sup>Dye-loading percentage (DL), <sup>[c]</sup>The amount of the photosensitizer (PS) in each photocatalytic experiment upon its adsorption (in moles), <sup>[d]</sup>The turnover number (TON) in 24h was calculated as the number the produced mole of H<sub>2</sub> divided by the number of mole of PS attached onto Pt-TiO<sub>2</sub> and <sup>[e]</sup> The activity was defined as the millimole of H<sub>2</sub> evolved per gram of Pt plus the Pt and Pd-porphyrin (whenever is present) per hour in the first 24 hours.



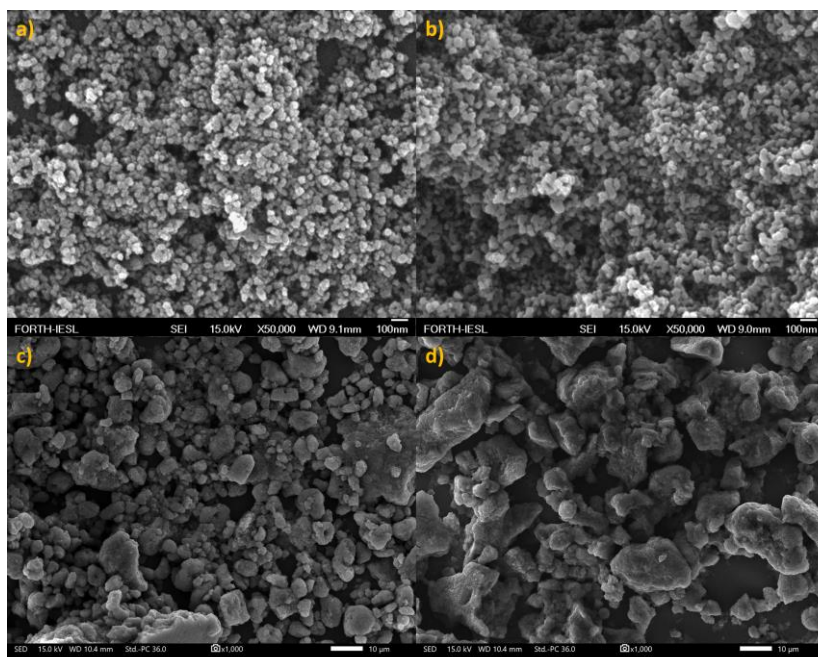

Figure S18. FESEM images of: a) Pt-TiO<sub>2</sub>, b) Pt-Tc<sub>3</sub>CP@PtTiO<sub>2</sub>, c) Zn-TCP@PtTiO<sub>2</sub>, and d) Pt-TCP@PtTiO<sub>2</sub>

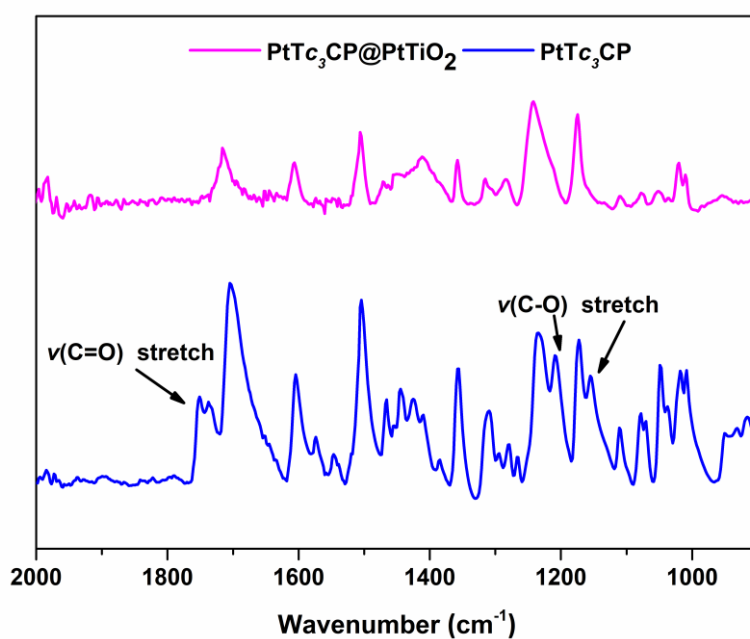

Figure S19. FT-IR-ATR spectra of Pt-Tc<sub>3</sub>CP solid and adsorbed on Pt-TiO<sub>2</sub> NPs.

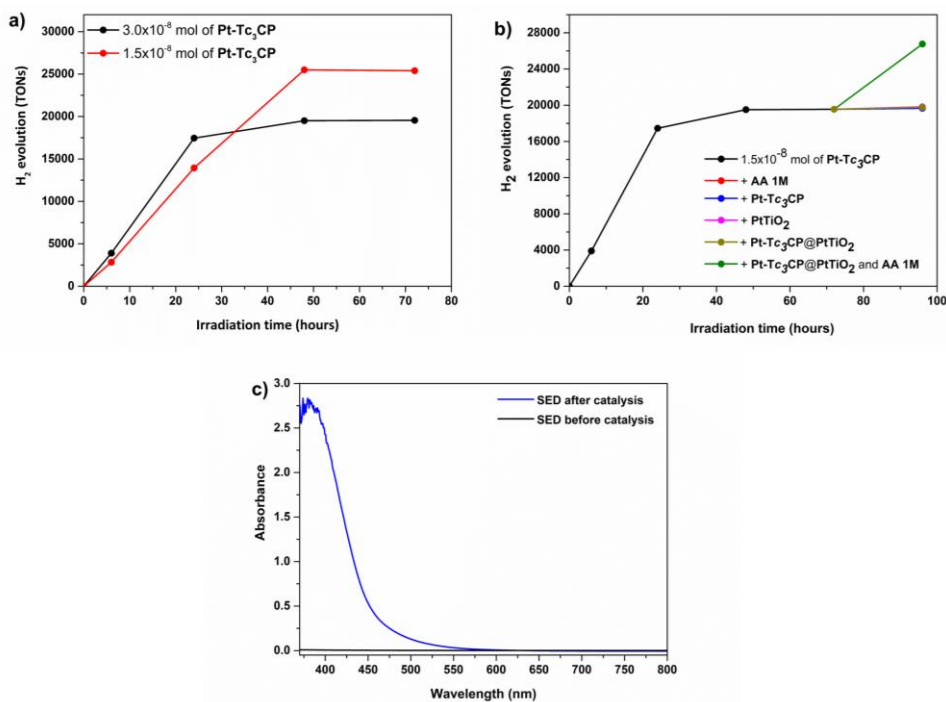

**Figure S20.** a) Photocatalytic H<sub>2</sub> evolution plots of Pt-Tc<sub>3</sub>CP-PtTiO<sub>2</sub> in different concentrations: 3.0x10<sup>-8</sup> mol (mol (black line) and 1.5x10<sup>-8</sup> mol (red line). The photo-catalytic experiments were conducted in an aqueous buffer 1M ascorbic acid at pH=4, b) regeneration experiments after adding additional amount of either i) Pt-Tc<sub>3</sub>CP or ii) AA 1M or iii) Pt-TiO<sub>2</sub>. Only when all three necessary components we added, H<sub>2</sub> was produced. c) UV-Vis spectrum of the SED medium before and after catalysis.

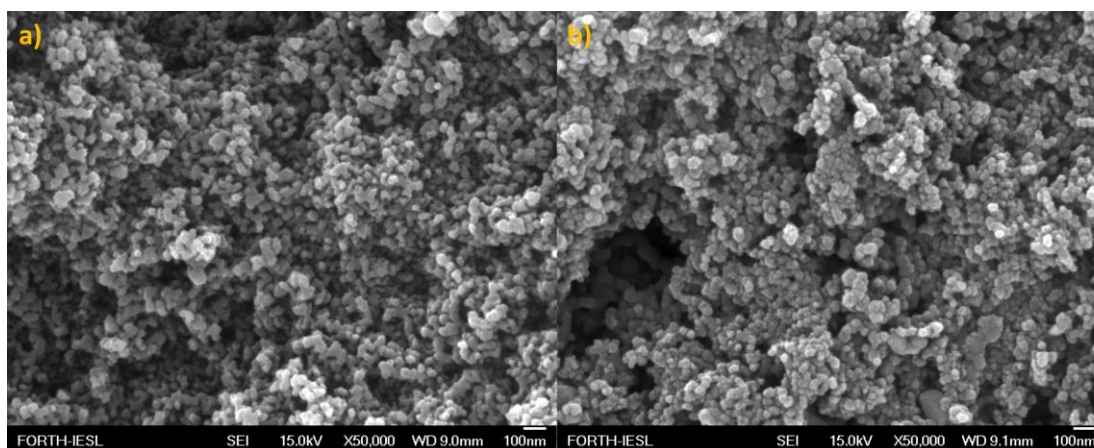

**Figure S21.** FESEM images of Pt-Tc<sub>3</sub>CP@PtTiO<sub>2</sub> before (a) and after catalysis (b, 48h).

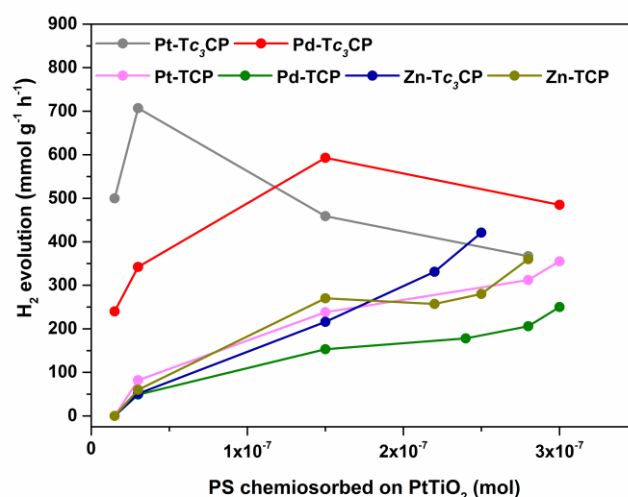

**Figure S22.** Plot of the H<sub>2</sub> evolution activity (in mmol g<sup>-1</sup> h<sup>-1</sup>) vs. the amount of the porphyrin onto PtTiO<sub>2</sub>.

## 5. References

1. Nikolaou, V. *et al.* Antenna Effect in BODIPY-(Zn)Porphyrin Entities Promotes H<sub>2</sub> Evolution in Dye-Sensitized Photocatalytic Systems. *ACS Appl. Energy Mater.* **4**, 10042–10049 (2021).
2. Yin, Q. *et al.* Metallization-Prompted Robust Porphyrin-Based Hydrogen-Bonded Organic Frameworks for Photocatalytic CO<sub>2</sub> Reduction. *Angew. Chemie - Int. Ed.* **61**, (2022).
3. Stangel, C. *et al.* Noble metal porphyrin derivatives bearing carboxylic groups: Synthesis, characterization and photophysical study. *Polyhedron* **52**, 1016–1023 (2013).
4. Ioannis, K., *et al.* The first use of porphyrins as catalysts in cross-coupling reactions: a water-soluble palladium complex with a porphyrin ligand as an efficient catalyst precursor for the Suzuki-Miyaura reaction in aqueous media under aerobic conditions. *Tetrahedron Lett.* **48**, 6688–6691 (2007).
5. Nikolaou, V. *et al.* Controlling Solar Hydrogen Production by Organizing Porphyrins. *ChemSusChem* **14**, 961–970 (2021).
6. Nikoloudakis, E. *et al.* Porphyrins and phthalocyanines as biomimetic tools for photocatalytic H<sub>2</sub> production and CO<sub>2</sub> reduction. *Chem. Soc. Rev.* **51**, (2022).
7. Kavan, L. *et al.* Electrochemical characterization of TiO<sub>2</sub> blocking layers for dye-sensitized solar cells. *J. Phys. Chem. C*, **18**, 16408-16418 (2014).
8. Y. Pellegrin, F. Odobel, Sacrificial electron donor reagents for solar fuel production. *C. R. Chimie* **20** 283-295 (2017).
